# Supplementary material for: Differential gene expression elicited by ZIKV infection in trophoblasts from congenital Zika syndrome discordant twins
Source: PubMed Central journal article supplement (PMC7425990; doi:10.1371/journal.pntd.0008424), 2020-08-03
Supplement: pntd.0008424.s001.pdf [file pntd.0008424.s001.pdf]

**A**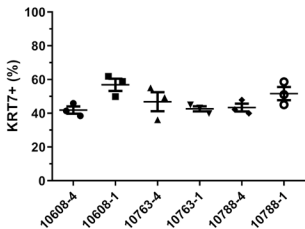**B**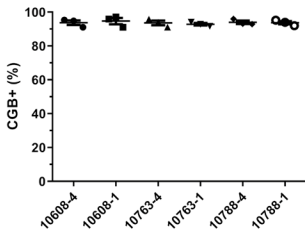

**S1 Fig. Quantification of positive staining for trophoblast markers in hiPSC-derived trophoblast cell lines from each of the six twins.** Immunostaining for (A) KRT7 and (B) CGB determined in three different replicates for each twin. No statistically significant differences among the different twins were observed (One-way ANOVA, Tukey's post-test,  $n = 3$  replicates for each twin).
