# Supplementary material for: Differential gene expression elicited by ZIKV infection in trophoblasts from congenital Zika syndrome discordant twins
Source: PubMed Central journal article supplement (PMC7425990; doi:10.1371/journal.pntd.0008424), 2020-08-03
Supplement: pntd.0008424.s002.pdf [file pntd.0008424.s002.pdf]

10608-4

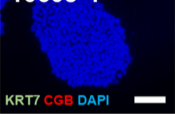

10763-4

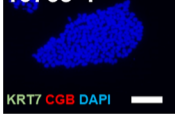

10788-4

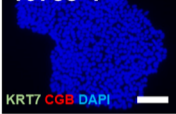

10608-1

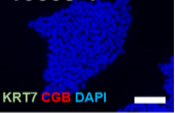

10763-1

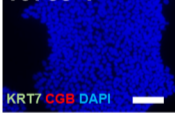

10788-1

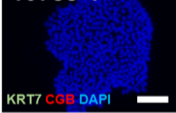

**S2 Fig. Undifferentiated iPSC cell lines from each of the six twins stained for KRT7 and CGB.**

Bar = 100  $\mu$ m.
