# Supplementary material for: Differential gene expression elicited by ZIKV infection in trophoblasts from congenital Zika syndrome discordant twins
Source: PubMed Central journal article supplement (PMC7425990; doi:10.1371/journal.pntd.0008424), 2020-08-03
Supplement: pntd.0008424.s003.pdf [file pntd.0008424.s003.pdf]

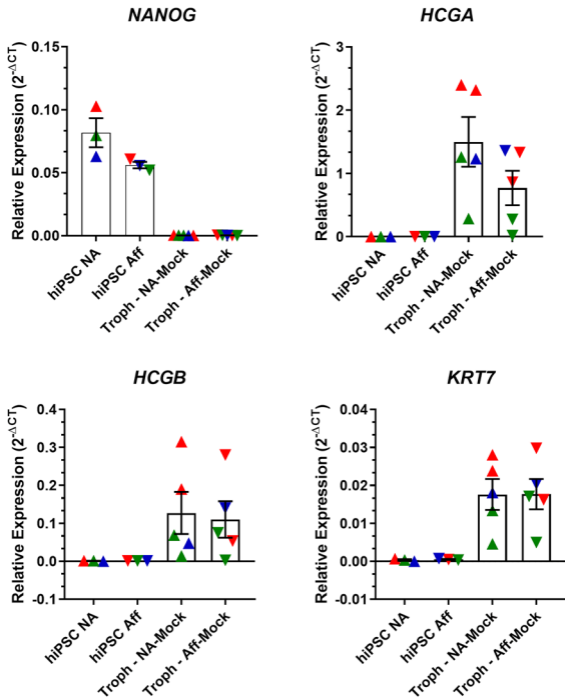

**S3 Fig. Expression measured by RT-qPCR of marker genes of hiPSCs and trophoblasts.** Expression measured by RT-qPCR of *NANOG*, a hiPSC marker, and of *HCGA*, *HCGB* and *KRT7*, three of the genes upregulated in the trophoblasts as compared with the hiPSCs. Twins from each family are represented with a different color: red, #10608 twins; blue, #10763 twins; green, #10788 twins. (mean ± SEM; n = 2 biological replicates, except for #10763 due to sample loss during culture)
