# Supplementary material for: Differential gene expression elicited by ZIKV infection in trophoblasts from congenital Zika syndrome discordant twins
Source: PubMed Central journal article supplement (PMC7425990; doi:10.1371/journal.pntd.0008424), 2020-08-03
Supplement: pntd.0008424.s005.pdf [file pntd.0008424.s005.pdf]

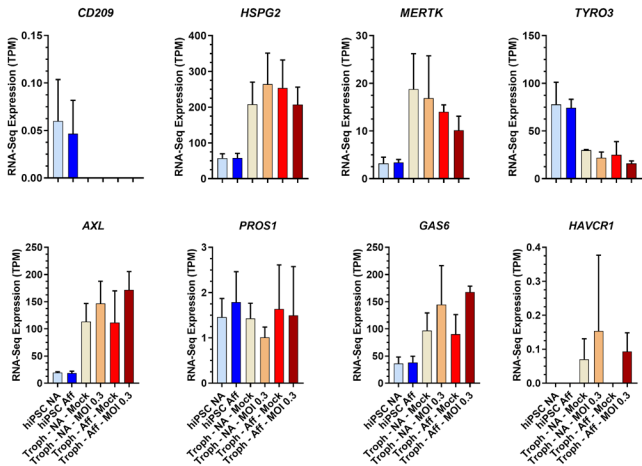

**S5 Fig. Expression levels measured by RNA-Seq of genes encoding candidate attachment factors implicated in ZIKV infection of human cells.** Related to Figure 2. The bars represent expression levels (in TPM) of eight candidate ZIKV attachment factor genes in hiPSCs from non-affected (light blue, hiPSC NA) or CZS-affected (dark blue, hiPSC Aff) twins, in the hiPSC-derived trophoblasts from non-affected twins' mock (yellow, Troph - NA-Mock) or ZIKV-infected cells (orange, Troph - NA-MOI 0.3), and in the hiPSC-derived trophoblasts from CZS-affected twins' mock (red, Troph - Aff-Mock) or ZIKV-infected cells (brown, Troph - Aff-MOI 0.3). None of these genes was significantly differentially expressed in hiPSC-derived trophoblasts from CZS-affected twins, when compared with hiPSC-derived trophoblasts from non-affected twins in pairwise comparisons (two-tailed t-test, equal variance). Error bars show SEM.
