# Supplementary material for: Differential gene expression elicited by ZIKV infection in trophoblasts from congenital Zika syndrome discordant twins
Source: PubMed Central journal article supplement (PMC7425990; doi:10.1371/journal.pntd.0008424), 2020-08-03
Supplement: pntd.0008424.s006.pdf [file pntd.0008424.s006.pdf]

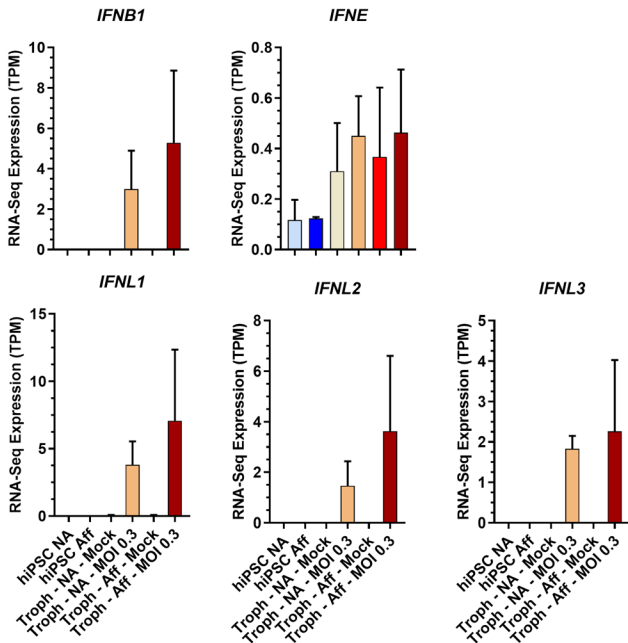

**S6 Fig. Expression levels measured by RNA-Seq of genes encoding representatives of Type I, Type II, and Type III IFNs.** Related to Figure 2. The bars represent expression levels (in TPM) of genes encoding interferons in hiPSCs from non-affected (light blue, hiPSC NA) or CZS-affected (dark blue, hiPSC Aff) twins, in the hiPSC-derived trophoblasts from non-affected twins' mock (yellow, Troph - NA-Mock) or ZIKV-infected cells (orange, Troph - NA-MOI 0.3), and in the hiPSC-derived trophoblasts from CZS-affected twins' mock (red, Troph - Aff-Mock) or ZIVK-infected cells (brown, Troph - Aff-MOI 0.3). None of these genes was significantly differentially expressed in hiPSC-derived trophoblasts from CZS-affected twins when compared with hiPSC-derived trophoblasts from non-affected twins in pairwise comparisons (two-tailed t-test, equal variance). None of the 13 recognized human *IFNA* (*IFNA1*, 2, 4, 5, 6, 7, 8, 10, 13, 14, 16, 17, 21), *IFNG*, *IFNK* and *IFNW1* genes were significantly expressed in any of the data sets. Error bars show SEM.
