# Supplementary material for: Differential gene expression elicited by ZIKV infection in trophoblasts from congenital Zika syndrome discordant twins
Source: PubMed Central journal article supplement (PMC7425990; doi:10.1371/journal.pntd.0008424), 2020-08-03
Supplement: pntd.0008424.s009.pdf [file pntd.0008424.s009.pdf]

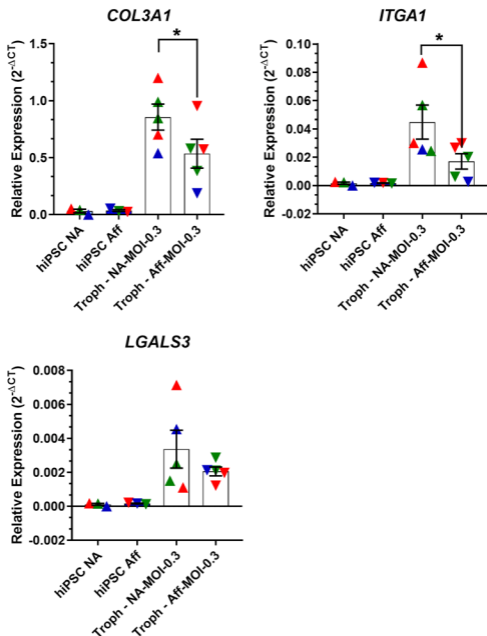

**S9 Fig. Expression measured by RT-qPCR of genes found in the RNA-Seq analysis downregulated after ZIKV<sup>BR</sup> infection in trophoblasts from CZS-affected when compared with non-affected twins.** Expression measured by RT-qPCR of *COL3A1*, *ITGA1* and *LGALS3*, three of the genes downregulated after ZIKV<sup>BR</sup> infection in trophoblasts from CZS-affected (Aff) when compared with non-affected (NA) twins. Twins from each family are represented with a different color: red, #10608 twins; blue, #10763 twins; green, #10788 twins. Mean  $\pm$  SEM is shown. (n = 2 biological replicates, except for #10763 due to sample loss during culture; One-tailed t-test, \* p<0.05).
