# Supplementary material for: Differential gene expression elicited by ZIKV infection in trophoblasts from congenital Zika syndrome discordant twins
Source: PLoS Negl Trop Dis. 2020 Aug 3;14(8):e0008424. doi: 10.1371/journal.pntd.0008424 (PMC7425990; doi:10.1371/journal.pntd.0008424)
Supplement: S3 Table — (XLSX) [file pntd.0008424.s012.xlsx]

## Sheet:  S3 Table
S3 Table. TPM values (obtained in the RNA-Seq analysis) from over 100 genes whose expression has been associated in the literature with the trophoblast lineage. Expression levels (in TPM) of trophoblast-associated gene markers are shown in hiPSCS, and in trophoblasts either before (Mock) or after infection with ZIKVBR (MOI 0.3)
Gene Name	hiPSC-10608-1	hiPSC-10608-4	hiPSC-10763-1	hiPSC-10763-4	hiPSC-10788-1	hiPSC-10788-4	Trophoblast-10608-1-Mock	Trophoblast-10608-4-Mock	Trophoblast-10763-1-Mock	Trophoblast-10763-4-Mock	Trophoblast-10788-1-Mock	Trophoblast-10788-4-Mock	Trophoblast-10608-1-MOI 0.3	Trophoblast-10608-4-MOI 0.3	Trophoblast-10763-1-MOI 0.3	Trophoblast-10763-4-MOI 0.3	Trophoblast-10788-1-MOI 0.3	Trophoblast-10788-4-MOI 0.3
ABCG2	1.75	1.09	0.86	0.77	1.01	4.35	24.96	28.09	33.76	31.64	6.54	11.68	14.39	17.07	40.43	21.39	17.61	13.83
ASCL1	0.06	0.02	0.07	0.06	0.1	0	0.03	0.02	0.02	0	0	0.02	0.05	0.06	0.11	0.06	0.02	0
ATP12A	2.28	0.48	0.89	0.26	0.51	0.66	0.38	0.49	0.2	0.12	0.79	0.27	0.12	0.23	0.29	0.21	0.71	0.43
C10orf10	1.38	0.4	2.15	2.36	0.37	0.25	48.28	67.11	63.64	54	74.82	13.48	36.72	50.85	94.82	49.9	56.16	19.85
CCR7	0	0.08	0.03	0.09	0.08	0.05	0.46	0.33	0.3	0.24	0.35	0.13	0.17	0.04	0.25	0.2	0.08	0.03
CD9	176.04	167.17	163.51	121.56	97.03	151.83	181.12	194.2	227.69	177.22	382.44	99.78	209.69	198.07	347.21	225.71	440.88	114.13
CDH1	110.89	109.66	123.18	143.32	69.58	102.13	172.8	153.82	144.77	138.48	281.38	114.4	237.29	247.18	206.91	146.39	251.29	178.36
CDH5	0.19	0.63	0.17	0.08	0.66	0.19	9.89	14.61	19.51	18.7	4.92	2.51	13.28	10.59	20.31	20.35	8.14	2.42
CDX2	0.15	0	0.01	0	0.03	0	0.19	0.33	0	0	0.01	0.17	0.01	0.02	0.02	0.05	0	0
CEBPA	2.02	1.17	1.84	1.5	1.35	2.18	8.95	11.7	12.02	7.5	2.18	6.97	3.4	7.59	9.3	5.18	1.95	4.03
CEBPB	30.15	25.63	27.88	18.32	28.28	30.74	162.86	113.06	105.62	132.47	95.75	39.7	177.27	175.66	151.85	262.75	111.24	88.32
CGA	0.98	1.2	0.62	0.42	0	0.07	3074.33	5972.25	3516.01	3265.87	153.85	922.2	656.05	2806.35	2656.59	932.05	39.17	420.53
CGB3	0.19	0.07	0.4	0	0	0	47.34	112.83	305.1	115.43	9.56	38.2	16.35	60.82	289.34	32.66	2.69	19.26
CGB5	0.29	0.15	0.3	0.32	0	0	102.2	247.8	208.01	51.45	8.22	25.05	29.43	127.08	178.46	17.32	1.53	10.92
CGB7	0.78	0.09	0.77	0.29	0.09	0.79	5.73	6.38	4.47	4.02	2.75	7.57	0.96	3.55	5.16	1.57	1.76	7.53
CGB8	0.19	0.18	0	0	0	0	216.61	523.5	427.43	179.8	10.65	58.85	75.71	276.58	389.04	52.72	1.56	29.66
CLIC3	0.1	0	0	0.09	0	0.33	7.52	10.81	11.04	8.64	3.1	2.4	2.63	5.53	8.3	4.43	1.76	2.18
COBLL1	1.72	1.17	1.92	1.89	1.97	1.86	4.49	13.4	25.56	17.91	17.37	12.78	13.67	20.71	33	22.95	16.24	17.84
COL3A1	3.5	1.24	1	0.67	6.34	0.63	3049.22	2893.63	1155.67	2081.05	914.98	2885.74	1294.55	2414.58	535.28	993.76	566.99	2440.83
COL6A3	3.16	1.45	1.33	0.54	0.84	3.28	23.51	9.57	1.49	3.83	10.64	6.35	1.33	5.64	0.42	0.5	0.98	2.62
CSH1	0	0	0	0	0	0.16	16.02	15.61	3.09	3.96	0	0.57	2.42	7.83	3.6	1.64	0	0.6
CYP11A1	3.76	1.22	3.71	2.15	1.42	3.15	78.86	102.97	75.05	61.99	3.58	15.44	16.4	51.41	66.65	25.22	4.28	9.07
CYP19A1	0.26	0.09	0	0.05	0.09	0.06	42.57	72.07	38.33	60.03	1.17	15.54	6.39	24.12	28.45	20.83	0.22	3.95
DLX3	0.17	0.02	0.08	0.12	0.16	0.09	4.76	6.2	6	5.1	1.27	3.96	3.78	7.14	5.77	4.21	1.45	3.13
DLX4	0.59	0.08	0.53	0.39	0.18	0.23	3.56	4.91	1.6	2.19	0.89	1.28	0.99	3.72	1.83	1.09	0.69	1.08
EFNA1	6.41	3.84	5.24	6.73	2.89	4.42	320.21	84.21	44.69	160.31	121.11	60.44	66.41	80.88	62.46	198	44.15	82.68
EGFR	1.67	1.05	0.96	0.54	1.73	2.55	19.47	29.5	37.81	40.08	32.51	28.18	31.34	25.5	51.63	68.74	32.4	33.1
ELF3	6.96	5.43	12	12.13	6.7	7.04	193.18	85.82	61.3	106.02	221.77	64.26	72.89	174.51	89.86	133.52	135.9	120.71
ELF5	0	0	0	0	0	0.02	0.12	0.13	0.03	0.08	0.64	0.88	0.05	0.09	0.06	0.07	0.27	0.28
EOMES	0.05	0.11	0.12	0.71	1.08	0.12	0	0	0	0	0	0	0	0.03	0.07	0	0	0.03
EPAS1	1.23	1.01	1.27	0.69	2.27	2.78	797.29	844.94	743.9	768.48	848.66	700.58	486.19	679.62	596.85	659.38	652.53	777.17
ERVFRD-1	0	0	0	0	0	0	1.37	1.2	1.3	2.3	0	0.96	0.58	1.33	1.51	1.18	0.03	0.36
ERVW-1	0	0	0.04	0.1	0	0	18.4	31.89	23.86	14.77	0.46	5.13	4.95	18.73	21.59	4.17	0.14	1.92
ESRRG	0.64	0.2	0.45	0.13	0.69	1.22	0.22	0.84	1.32	0.59	0.03	0.22	0.19	0.51	1.64	0.36	0.15	0.19
FGFR2	44.9	39.7	49.66	60.43	32.77	33.94	13.27	14.56	16.68	7.91	9.08	21.4	6.82	7.07	9.27	6.7	11.24	14.42
GABRP	6.84	2.5	2.94	1.17	1.44	3.62	861.03	1075.2	816.02	1003.04	497.78	1445.95	238.2	574.34	245.52	163.55	355.41	986.75
GATA2	0.24	0.08	0.09	0.86	0.18	0.18	34.62	50.19	62.95	44	34.54	22.81	24.17	43.4	64.98	37.53	37.03	21.55
GATA3	0.42	0.12	0.38	0.2	1.04	0.29	176.63	172.5	167.33	144.54	126.26	137.72	152.77	174.71	205.1	148.07	160.71	168.02
GCM1	0.06	0.02	0.02	0	0	0.06	1.68	4.67	3.21	2.47	0.09	0.31	0.55	1.68	3.3	1.8	0.1	0.42
ADGRG1	4.05	3.2	4.5	3.07	4.69	2.33	98.16	118.24	68.38	86.02	118.1	93.38	79.45	130.78	82.07	93.66	100.49	108.42
HAND1	0.13	0.03	0.13	0.34	0	0.07	1135.66	832.73	340.95	521.67	243.38	546.82	332.26	810	141.35	172.28	167.82	511.52
HAPLN1	1.04	0.79	0.7	0.57	4.73	0.66	5.37	2.06	6.45	3.2	0.12	2.14	1.32	0.58	3.41	1.15	0.84	1.16
HEY1	0.44	0.75	0.91	0.43	3.47	1.06	109.48	117.43	44.6	55.6	57.54	135.6	12.73	78.73	9.94	12.88	4.84	74.1
HGF	0.14	0.26	0.07	0.02	0.16	0.04	0	0	0	0	0	0	0	0	0	0	0	0
HLA-G	1.65	2.15	2.85	1.77	0.74	0.85	1.39	3.02	4.23	3	1.06	0.09	0.5	1.8	4.32	3.56	0.84	0
HOPX	0	0	0	0	0.08	0	7.38	12.87	9.24	7.41	0.28	1.6	1.15	4.84	7.5	1.42	0.16	0.91
HSD3B1	0	0.04	0	0.4	0	0.04	116.89	219.24	367.88	172.8	10.91	40.22	33.02	79.76	284.92	99.27	13.24	26.86
IGF2	2.29	0.77	2.5	1.26	0.44	1.17	1383.09	2040.74	1069.15	1181.22	1751.07	1163.34	946.68	1808.45	769.99	808.82	986.51	1033.05
INSL4	0	0	0	0	0	0	3.48	6.31	4.18	3.27	0.14	0.79	1.38	3.05	2.95	1.56	0.09	0.26
ITGA1	1.06	0.65	0.89	1.31	1.01	1.79	3.57	4.89	4.55	12.59	10.57	10.48	14.51	29.74	4.02	18.63	5.23	25.85
ITGA3	13.5	10.96	9.45	6.85	7.34	10.5	192.84	164.41	223.58	251.47	123.39	104.65	208.3	243.96	294.7	287.26	158.08	184.2
ITGA5	24.4	16.74	13.42	13.25	24.97	23.21	67.63	60.24	94.01	109.76	76.2	35.14	123.37	101.91	133.53	201.39	85.76	79.39
ITGA6	57.82	62.35	60	79.05	70.29	59.78	13.99	25.53	48.16	52.09	28.37	11.73	36.46	41.22	62.81	60.76	33.42	33.2
ITGAV	7.28	6.86	7.36	6.84	17.97	9.73	30.76	67.28	69.03	107.54	66.92	88.15	63.69	98.6	69.81	65.33	62.77	115.71
ITGB1	177.56	139.94	141.45	96.85	148.33	189.75	163.66	361.11	506.66	567.98	436.71	361.48	548.44	460.17	512.37	726.24	464.01	443.15
ITGB3	0.15	0.07	0.08	0.04	0.04	0.14	1.51	2.48	2.27	2.25	0.28	0.41	2.15	0.88	3.07	3.01	0.76	0.87
ITGB6	0.1	0.04	0.23	0.1	0	0.02	114.68	241.11	188.33	280.16	350.31	218.26	126.86	200.59	186.71	193.38	160.99	243.14
KLF5	0.85	0.36	0.42	0.49	0.69	0.93	11.14	15.41	18.48	16.21	35.7	10.68	26.71	19.03	29.52	25.44	39.2	20.54
KRT18	372.11	498.74	386.84	358.93	548.02	553.1	5077.86	4639.34	6128.87	4936.77	4536.41	2733.94	4840.97	4428.32	8194.76	4891.42	5739.37	4309.76
KRT20	0	0	0	0	0	0	0	0	0	0	0	0	0	0	0	0	0	0
KRT23	0	0	0.12	0	0.17	0.08	48.94	55.63	63.51	44.97	16.52	28.3	27.04	35.84	61.63	16.63	22.6	21.75
KRT7	16.77	13.2	20.67	19.4	11.58	11.25	1013.44	663.72	1349.26	977.99	693.2	283.79	1059.89	695.54	1885.72	1614.59	1243.2	724.86
KRT8	232.9	246.44	249.91	247.03	316.36	340.78	5859.06	5533.94	5967.67	5056.98	5592.62	3462.66	4585.52	4627.69	7224.62	4390.17	5716.58	4628.91
LAMA1	47.33	39.16	37.97	35.26	38.6	34.07	20.4	19.22	29.8	15.14	21.94	41.88	6.84	12.4	18.85	10.68	13.33	27.17
LCP1	2.33	1.2	0.65	0.82	0.76	4.19	82.65	57.75	105.06	111.44	89.31	48.45	129.19	95.86	172.8	194.68	166.96	93.83
LGALS16	0	0	0	0	0	0	7.55	8.76	5.91	7.59	0.27	2.13	0.75	2.6	4.37	1.79	0	0.65
LHB	0.19	0	0.2	0.18	0	0	0	0	0.66	0.24	0	0	0	0	0	0	0	0
LIFR	3.3	1.89	2.38	1.22	3.04	3.68	4.55	12.63	8.43	8.72	4.98	9.05	3.96	9.12	6.38	4.54	3.91	6.01
LOXL4	0.49	0.12	0.19	0.05	0.38	0.66	2.92	0.85	4.3	2.78	0.42	1.61	1.91	4.92	4.29	2.1	1.03	3.11
LUM	0.42	0.19	0.23	0.4	2.8	0.1	265.99	704.22	339.17	459.11	22.44	1205.69	98.33	438.16	112.64	81.46	21.92	722.44
MAFK	10.76	9.93	10.02	9.48	9.31	12.38	43.53	34.73	24.37	28.88	24.82	21.99	30.18	23.95	33.68	38.15	24.96	23.44
MFAP5	0.87	0	0.19	0	2.02	0.04	23.03	104.83	210.43	103.56	18.18	62.94	22.08	26.89	148.12	81.74	21.05	45.02
MRGPRX1	0	0	0	0	0	0	0	0	0.09	0.06	0	0	0	0	0	0	0	0
MSX2	0.4	0.2	0.2	0.3	1.25	0.23	48.91	38.76	36.31	33.42	17.72	31.63	38.08	59.26	30.97	34.54	27.5	36.39
MUC15	0	0	0	0.03	0.07	0	0.99	1.83	1.58	3.1	0.17	0.61	0.99	2.72	3.91	1.49	2.28	1.1
MXD1	0.45	0.56	0.5	1.3	0.82	0.42	2.3	4.15	4.64	5.34	8.51	2.36	6.82	4.25	13.89	16.61	14.76	5.14
NID2	9.42	3.63	3.86	8.46	3.89	6.3	92.78	91.26	65.01	68.64	22.1	122.48	21.46	68.33	26.55	23.1	16.1	68.6
NUPR1	1.15	0.57	0.71	0.47	0.8	0.14	0.82	1.44	1.5	1	0.41	0.34	0.23	0.69	0.97	1.99	0.49	0.01
OVOL1	1.57	1.23	2.47	3.02	1.34	1.78	15.08	7	6.78	9.06	22.34	3.09	15.17	14.26	21.02	18.79	26.2	10.37
PAPPA2	0.29	0.31	0.1	0.08	0.2	0.49	141.28	139.79	33.79	53.73	22.71	107.14	30.04	175.1	11.98	10.75	12.8	67.34
PDGFRB	8.25	7.62	5.98	2.54	9.04	9.16	10.28	13.85	19.11	20.98	14.69	10.97	5.16	5.01	9.5	8.34	8.37	12.61
PGF	5.11	1.87	3.05	0.86	1.96	5.69	107.71	184.88	104.26	97.88	1.83	17.73	22.19	82.14	85.17	45.27	1.89	9.68
PHLDA2	10.35	5.2	4.98	20.97	8.84	8.79	43.69	50.96	38.27	47.77	26.81	8.38	60.65	54.47	76.46	111.12	76.32	16.56
PPARD	11.04	12.34	10.3	10.33	13.4	11.67	19.09	19.56	15.73	13.43	10.86	14.31	12.85	18.57	15.06	14.01	12.27	14.85
PPARG	0.12	0.12	0.07	0.16	0.53	0.21	12.45	17.64	22.98	17.37	5.57	17.05	8.81	14.93	19.35	12.7	7.02	16.54
PRKCH	2	1.16	1.26	0.61	0.99	3.13	39.67	39.5	30.92	32.08	34.72	39.75	23.65	37.53	29.67	19.52	36.47	39.71
PRR5	17.78	14.8	14.3	14.87	12.68	17.98	34.96	24.27	20.14	22.78	11.98	33.58	25.26	23.48	16.57	20.91	11.1	38.8
PSG4	0	0	0	0	0	0	10.64	28.06	47.99	11.88	0.23	46.69	7.27	10.94	47.79	6.77	0.27	37.17
RAB25	55.29	41.79	39.95	45.12	34.36	60.3	217.23	185.69	124.81	132.62	301.6	187.52	185.18	236.32	164.67	130.85	254.64	176.23
RSPO2	0.22	0.26	0.46	0.31	0.75	0.66	0.28	0.13	0.06	0.06	0.02	0.37	0	0.03	0	0	0	0.08
S100P	0.6	0.05	0	0.09	0	0.68	71.62	100.34	50.33	43.74	44.29	7.96	32.26	55.03	63.3	39.44	32.14	5.21
SLC13A4	5.49	2.44	5.76	2.27	1.82	2.81	2.82	2.33	1.92	3.7	0.02	1.3	1.55	3.15	1.75	3.01	0.04	0.69
SLC38A3	1.08	1.3	1.13	2.06	0.53	0.67	1.23	0.8	1.54	1.05	0.12	0.06	0.14	0.66	0.55	0.25	0.39	0.21
SLC40A1	0.1	0.02	0	0.03	0.12	0.03	11.98	26.22	18.72	9.49	15.61	28.76	2.97	11.44	5.68	2.6	3.47	10.88
SPNS2	1.03	0.21	0.66	0.21	0.21	1.21	186.56	154.95	25.52	70.55	114.36	70.38	65.58	105.79	20.86	60.51	43.85	110.4
TEAD4	39.39	57.53	40.07	37.48	59.52	72.48	22.29	20.38	21.89	24.54	14.51	20.01	37.33	24.85	31.07	32.71	23.31	28.1
TFAP2A	0.26	0.09	0.29	3.21	0.93	0.04	78.27	108.88	103.45	97.07	144.05	92.68	104.57	120.49	109.4	89.94	124.02	109.87
TFAP2C	3.14	0.89	2.6	3.21	0.72	3.76	36.93	30.57	20.16	28.93	33.37	19.63	26.66	33.65	17.38	26.68	30.09	23.29
TGM2	1.33	0.72	0.91	0.94	1	1.2	875.6	945.65	1146.67	1035.22	336.71	757.29	808.78	751.66	1705.78	1024.86	647.39	1091.79
TRPV2	2.11	3.08	1.24	0.62	0.87	2.57	0.82	0.85	0.33	0.94	0.5	0.29	0.76	0.54	0.92	0.4	0.66	0.25
VGLL1	0	0	0.05	0	0	0	174.71	141.61	103.24	96.66	76.2	148.69	114.6	137	97.51	74.29	117.68	141.96
VTCN1	0.14	0.4	0.62	0.49	0.25	0.37	443.6	541.21	323.12	320.61	539.9	475.77	135.71	333.09	153.66	57.34	165.63	298.88
XAGE2	0	0	0	0	0.15	0	40.58	76.33	63.55	70.58	30.5	56.46	16.01	28.6	85.64	46.01	52.64	46.13
